# Supplementary material for: Effect of Environmental Exposures on the Gut Microbiota from Early Infancy to Two Years of Age
Source: MDPI journal article supplement (doi:10.3390/microorganisms9102140), 2021-10-13
Supplement: s1 [file s1]

Supplementary

**Table S1: Variables implemented in the LonGP with variable explanation and kernel type**

| Variable name       | Variable explanation                        | Kernel type                                     |
|---------------------|---------------------------------------------|-------------------------------------------------|
| age                 | Child age at sampling                       | Squared exponential kernel                      |
| ship                | Sample shipping time                        | Non-stationary kernel                           |
| mombmi              | Maternal pre-pregnancy BMI                  | Squared exponential kernel                      |
| abxcurrently        | Antibiotic exposure at the time of sampling | Non-stationary kernel                           |
| abxever             | Antibiotic exposure since birth             | Binary Kernel                                   |
| bf                  | Breastfeeding status                        | Non-stationary (ns) kernel                      |
| cohort              | Cohort                                      | Binary Kernel                                   |
| rout                | Delivery mode                               | Binary Kernel                                   |
| sex                 | Child sex                                   | Binary Kernel                                   |
| id <sup>1</sup>     | Individual ID                               | Categorical kernel                              |
| id*age <sup>2</sup> | interaction term for Individual ID and age  | Categorical kernel * Squared exponential kernel |

<sup>1</sup> Individual ID variable represents baseline differences between different individuals in the model.

<sup>2</sup> This interaction term represents individual time-varying random effect.

**Table S2. Population characteristics of infants with all four samples**

|                                                  | <b>1 Month</b> | <b>6 Months</b> | <b>12 Months</b> | <b>24 Months</b> |
|--------------------------------------------------|----------------|-----------------|------------------|------------------|
| <b>n</b>                                         | 34             | 34              | 34               | 34               |
| <b>Vaginal Delivery<sup>1</sup></b>              | 22 (64.7)      |                 |                  |                  |
| <b>Girls</b>                                     | 10 (29.4)      |                 |                  |                  |
| <b>Infant breastmilk</b>                         |                |                 |                  |                  |
| <b>100</b>                                       | 22 (64.7)      | 6 (17.6)        | 0 (0)            | 0 (0)            |
| <b>&gt;50-80</b>                                 | 6 (17.6)       | 16 (47.1)       | 2 (5.9)          | 0 (0)            |
| <b>20-50</b>                                     | 6 (17.6)       | 2 (5.9)         | 11 (32.4)        | 2 (5.9)          |
| <b>0</b>                                         | 0 (0)          | 10 (29.4)       | 21 (61.8)        | 31 (91.2)        |
| <b>Missing</b>                                   | 0 (0)          | 0 (0)           | 0 (0)            | 1 (2.9)          |
| <b>Antibiotic exposure currently<sup>1</sup></b> | 1 (2.9)        | 0 (0)           | 3 (8.8)          | 0 (0)            |
| <b>Antibiotic exposure ever<sup>1</sup></b>      | 2 (5.9)        | 3 (8.8)         | 11 (32.4)        | 11 (32.4)        |
| <b>Maternal pre-pregnancy BMI<sup>2</sup></b>    | 28.9 ± 5.9     |                 |                  |                  |
| <b>Infant age<sup>2</sup></b>                    | 39.0 ± 32.3    | 204.1 ± 23.1    | 386.0 ± 20.5     | 750.2 ± 23.0     |
| <b>Sample shipping time<sup>2</sup></b>          | 5.4 ± 3.4      | 4.8 ± 3.8       | 4.7 ± 5.2        | 4.6 ± 3.8        |

<sup>1</sup>n (%)

<sup>2</sup>mean ± SD

**Table S3: significant MaAsLin results for 50 most abundant taxa**

| metadata    | feature                               | value       | coef     | stderr   | N   | pval     | qval     |
|-------------|---------------------------------------|-------------|----------|----------|-----|----------|----------|
| age_in_days | Acinetobacter                         | age_in_days | -0.31741 | 0.085538 | 162 | 0.000292 | 0.003065 |
| age_in_days | Akkermansia                           | age_in_days | 0.369688 | 0.13294  | 162 | 0.006116 | 0.045868 |
| age_in_days | Alistipes                             | age_in_days | 0.589512 | 0.099991 | 162 | 2.46E-08 | 1.55E-06 |
| age_in_days | Bacteroides                           | age_in_days | 0.511948 | 0.12336  | 162 | 5.63E-05 | 0.000806 |
| age_in_days | Bilophila                             | age_in_days | 0.266434 | 0.078296 | 162 | 0.000882 | 0.007715 |
| age_in_days | Christensenellaceae<br>R.7_group      | age_in_days | 0.251625 | 0.055411 | 162 | 1.14E-05 | 0.000238 |
| age_in_days | Erysipelatoclostridium                | age_in_days | 0.41434  | 0.083567 | 162 | 1.88E-06 | 5.39E-05 |
| age_in_days | Escherichia.Shigella                  | age_in_days | -0.43714 | 0.111014 | 162 | 0.000125 | 0.001514 |
| age_in_days | Faecalibacterium                      | age_in_days | 0.794244 | 0.102827 | 162 | 1.41E-12 | 2.22E-10 |
| age_in_days | Lachnospiraceae<br>unclassified       | age_in_days | 0.443871 | 0.091501 | 162 | 3.01E-06 | 7.91E-05 |
| age_in_days | Parasutterella                        | age_in_days | 0.413565 | 0.106869 | 162 | 0.000162 | 0.001886 |
| age_in_days | Peptostreptococcaceae<br>unclassified | age_in_days | 0.391366 | 0.078749 | 162 | 1.79E-06 | 5.39E-05 |
| age_in_days | Prevotella_9                          | age_in_days | 0.394624 | 0.083593 | 162 | 5.62E-06 | 0.000136 |
| age_in_days | Ruminococcaceae_ge                    | age_in_days | 0.283425 | 0.065734 | 162 | 2.94E-05 | 0.000488 |
| age_in_days | Ruminococcaceae<br>UCG.014            | age_in_days | 0.344501 | 0.078299 | 162 | 2.03E-05 | 0.000399 |
| age_in_days | Ruminococcaceae<br>unclassified       | age_in_days | 0.329695 | 0.080338 | 162 | 6.64E-05 | 0.00091  |
| age_in_days | Ruminococcaceae<br>unclassified.1     | age_in_days | 0.173792 | 0.043311 | 162 | 9.45E-05 | 0.00119  |
| age_in_days | Ruminococcus_2                        | age_in_days | 0.715051 | 0.073904 | 162 | 1.77E-17 | 5.59E-15 |
| age_in_days | Turicibacter                          | age_in_days | 0.321417 | 0.051989 | 162 | 5.76E-09 | 4.53E-07 |
| bf          | Acinetobacter                         | 3_20-50%    | 0.710755 | 0.206955 | 162 | 0.000786 | 0.007078 |
| bf          | Acinetobacter                         | 4_0%        | 0.903938 | 0.216972 | 162 | 5.18E-05 | 0.000806 |
| bf          | Bacteroides                           | 3_20-50%    | -0.83825 | 0.296287 | 162 | 0.005382 | 0.042384 |
| bf          | Bifidobacterium                       | 2_>50-80%   | 0.829587 | 0.279164 | 162 | 0.003498 | 0.028255 |
| bf          | Erysipelatoclostridium                | 3_20-50%    | 0.634055 | 0.205908 | 162 | 0.002463 | 0.020415 |
| bf          | Erysipelatoclostridium                | 4_0%        | 0.571422 | 0.207261 | 162 | 0.006548 | 0.046879 |
| bf          | Erysipelotrichaceae_ge                | 2_>50-80%   | 0.459713 | 0.167511 | 162 | 0.006856 | 0.047994 |
| bf          | Erysipelotrichaceae_ge                | 3_20-50%    | 0.632108 | 0.183485 | 162 | 0.000749 | 0.00694  |
| bf          | Erysipelotrichaceae_ge                | 4_0%        | 0.68023  | 0.186894 | 162 | 0.000375 | 0.003815 |
| bf          | Faecalibacterium                      | 4_0%        | 0.881628 | 0.255029 | 162 | 0.000709 | 0.006764 |
| bf          | Lachnospiraceae<br>unclassified       | 2_>50-80%   | 0.562044 | 0.206106 | 162 | 0.007144 | 0.048921 |
| bf          | Lachnospiraceae                       | 3_20-50%    | 1.487852 | 0.225457 | 162 | 6.48E-10 | 6.80E-08 |

|     |                                       |           |          |          |     |          |          |
|-----|---------------------------------------|-----------|----------|----------|-----|----------|----------|
|     | unclassified                          |           |          |          |     |          |          |
| bf  | Lachnospiraceae<br>unclassified       | 4_0%      | 1.308719 | 0.226939 | 162 | 4.37E-08 | 2.29E-06 |
| bf  | Parasutterella                        | 4_0%      | 0.949131 | 0.266781 | 162 | 0.000502 | 0.004941 |
| bf  | Peptostreptococcaceae<br>unclassified | 2_>50-80% | 0.663934 | 0.177369 | 162 | 0.000263 | 0.002856 |
| bf  | Peptostreptococcaceae<br>unclassified | 3_20-50%  | 0.806313 | 0.194025 | 162 | 5.52E-05 | 0.000806 |
| bf  | Peptostreptococcaceae<br>unclassified | 4_0%      | 0.912584 | 0.195329 | 162 | 6.68E-06 | 0.00015  |
| bf  | Ruminococcaceae<br>unclassified       | 2_>50-80% | 0.494493 | 0.178969 | 162 | 0.006517 | 0.046879 |
| bf  | Ruminococcaceae<br>unclassified       | 3_20-50%  | 0.848386 | 0.196248 | 162 | 2.89E-05 | 0.000488 |
| bf  | Ruminococcaceae<br>unclassified       | 4_0%      | 0.816524 | 0.201551 | 162 | 8.14E-05 | 0.001068 |
| bf  | Staphylococcus                        | 2_>50-80% | -0.95516 | 0.187923 | 162 | 1.08E-06 | 3.78E-05 |
| bf  | Staphylococcus                        | 3_20-50%  | -1.07547 | 0.205566 | 162 | 5.48E-07 | 2.16E-05 |
| bf  | Staphylococcus                        | 4_0%      | -1.12689 | 0.206917 | 162 | 2.03E-07 | 9.12E-06 |
| bf  | Veillonella                           | 2_>50-80% | 1.081118 | 0.249326 | 162 | 2.82E-05 | 0.000488 |
| bf  | Veillonella                           | 3_20-50%  | 1.043425 | 0.273887 | 162 | 0.000208 | 0.00234  |
| bf  | Veillonella                           | 4_0%      | 0.948916 | 0.284657 | 162 | 0.001078 | 0.009175 |
| sex | Alistipes                             | Male      | 0.576308 | 0.198871 | 162 | 0.005855 | 0.044982 |

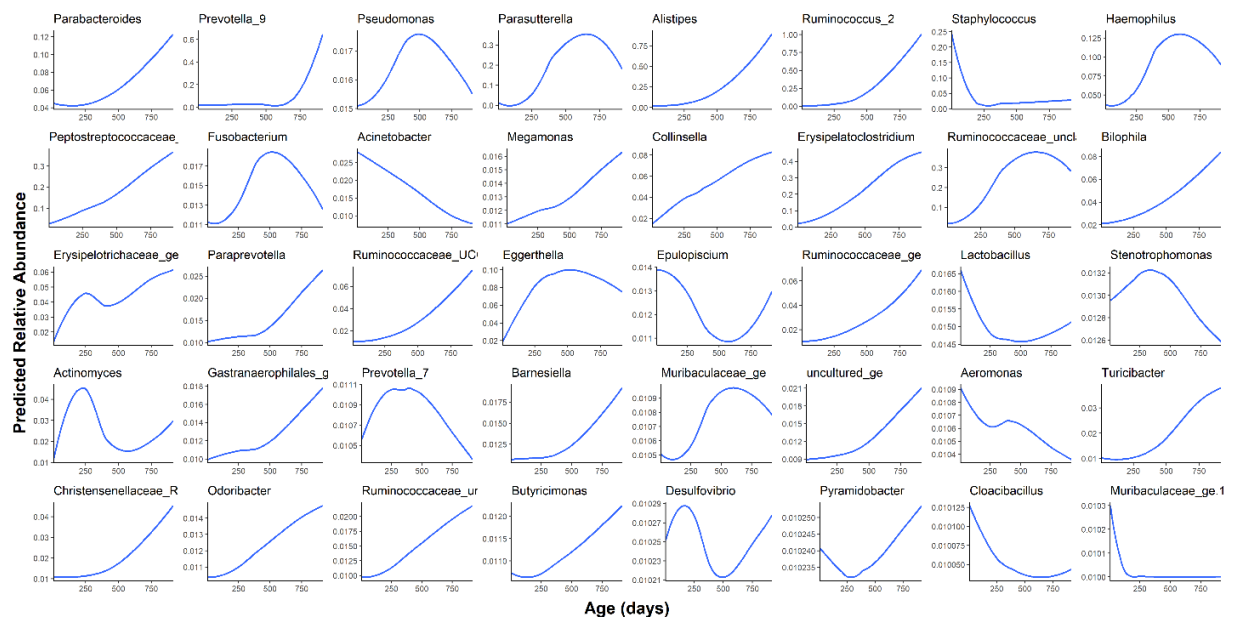

**Figure S1. Predicted abundance by infant age for the 40 least abundant genera.**

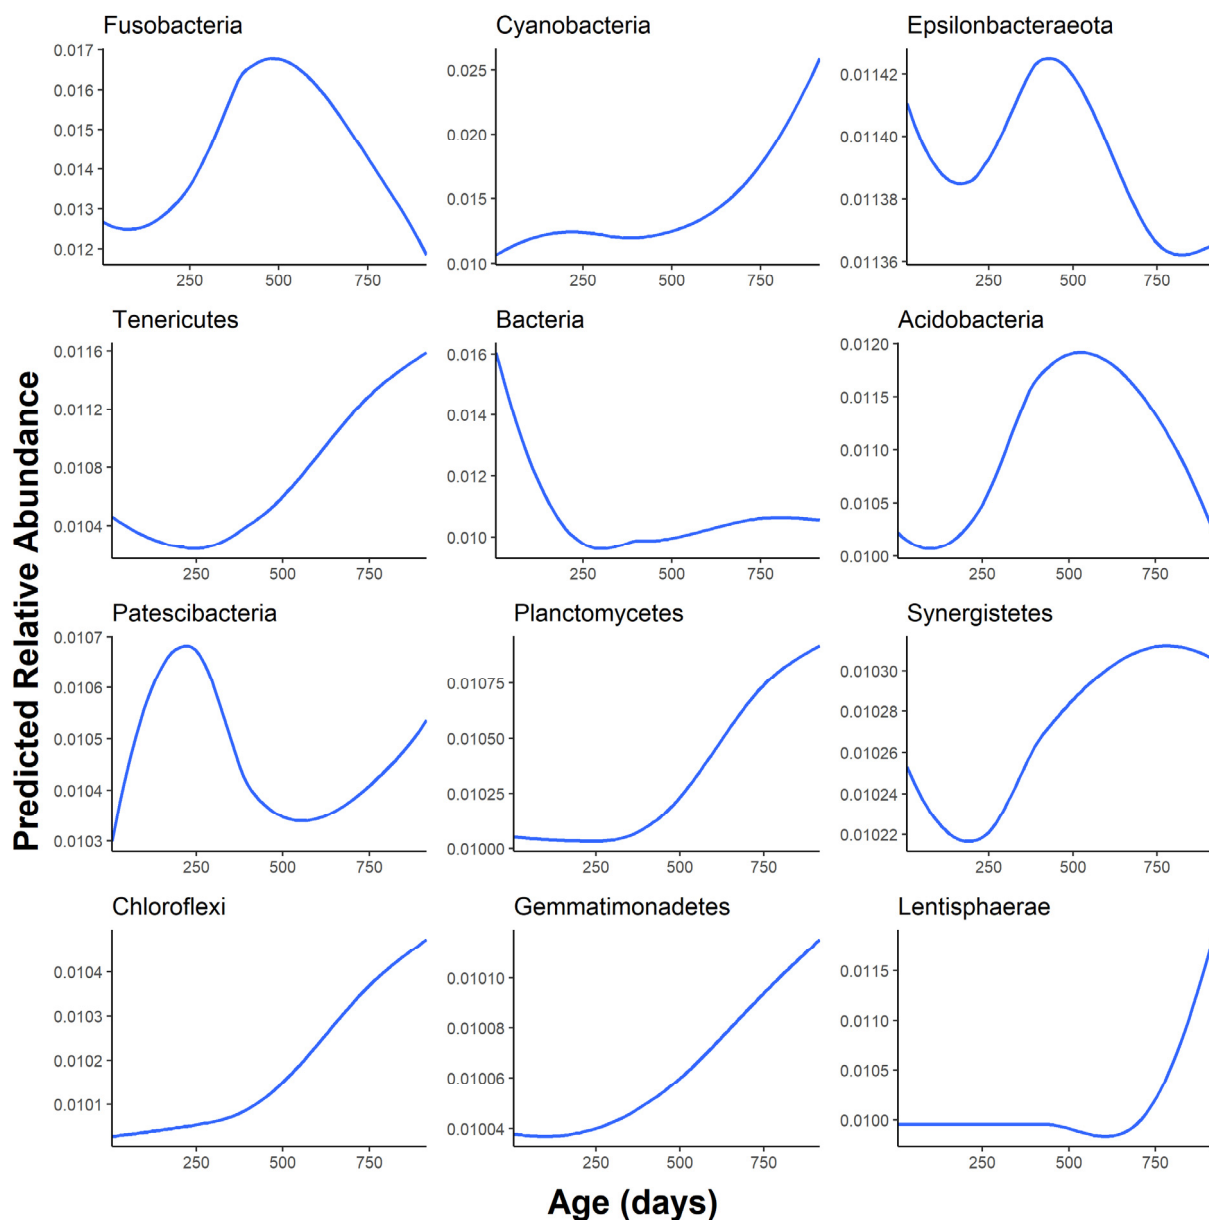

**Figure S2. Predicted abundance by infant age for the 12 least abundant phyla.**

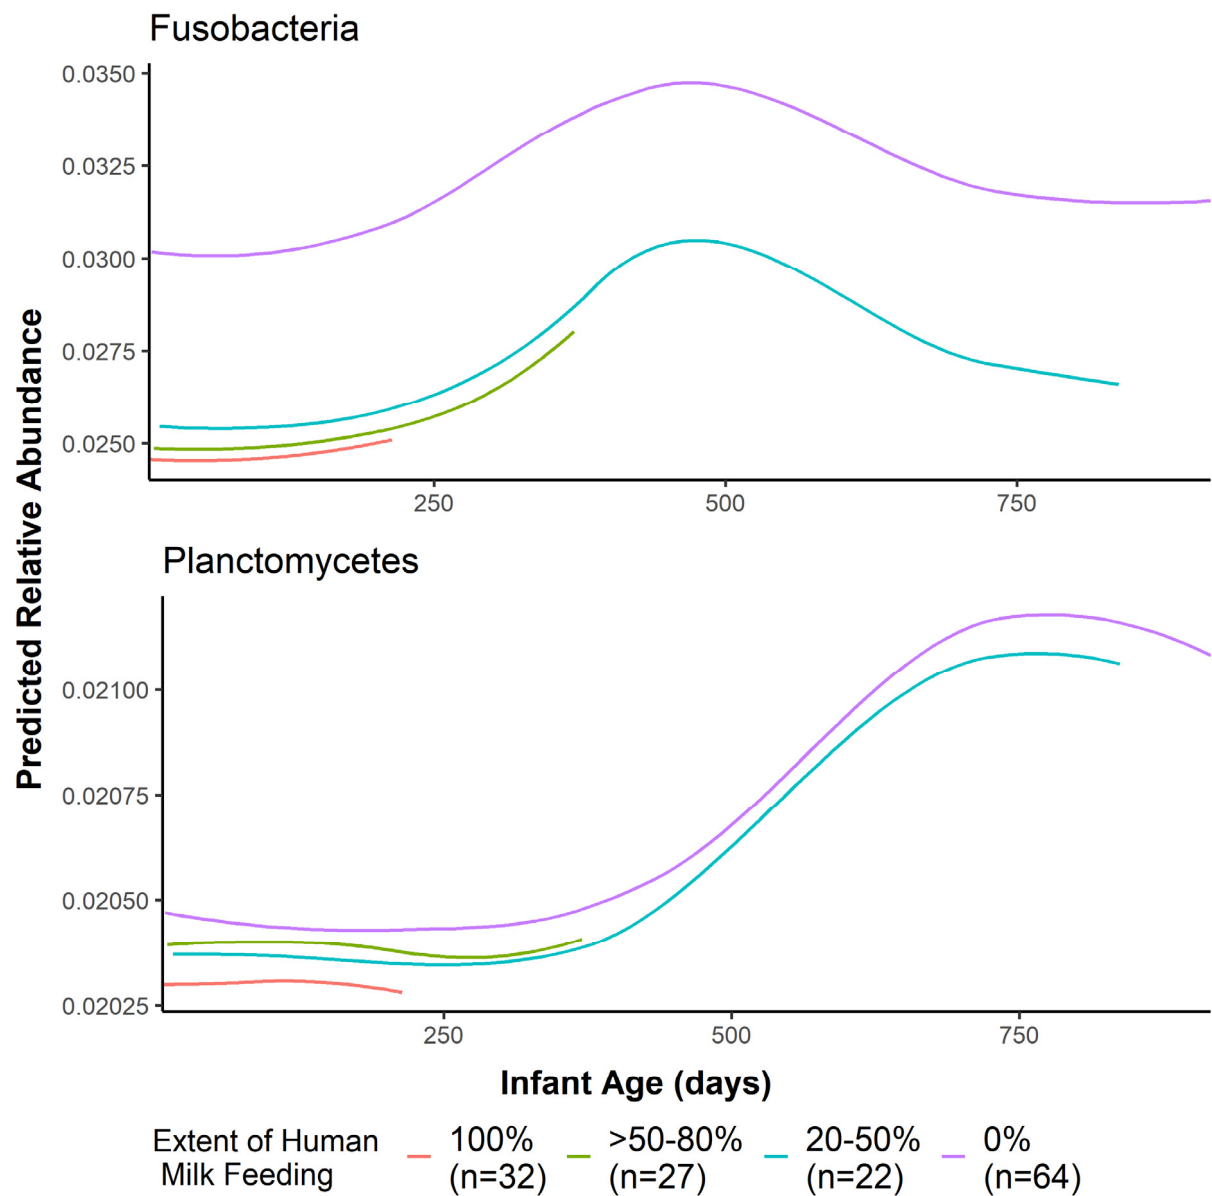

**Figure S3. Phylum relative abundance predicted by age and human milk in the infant diet.** Only the phyla whose abundance was significantly predicted by age and human milk are plotted.

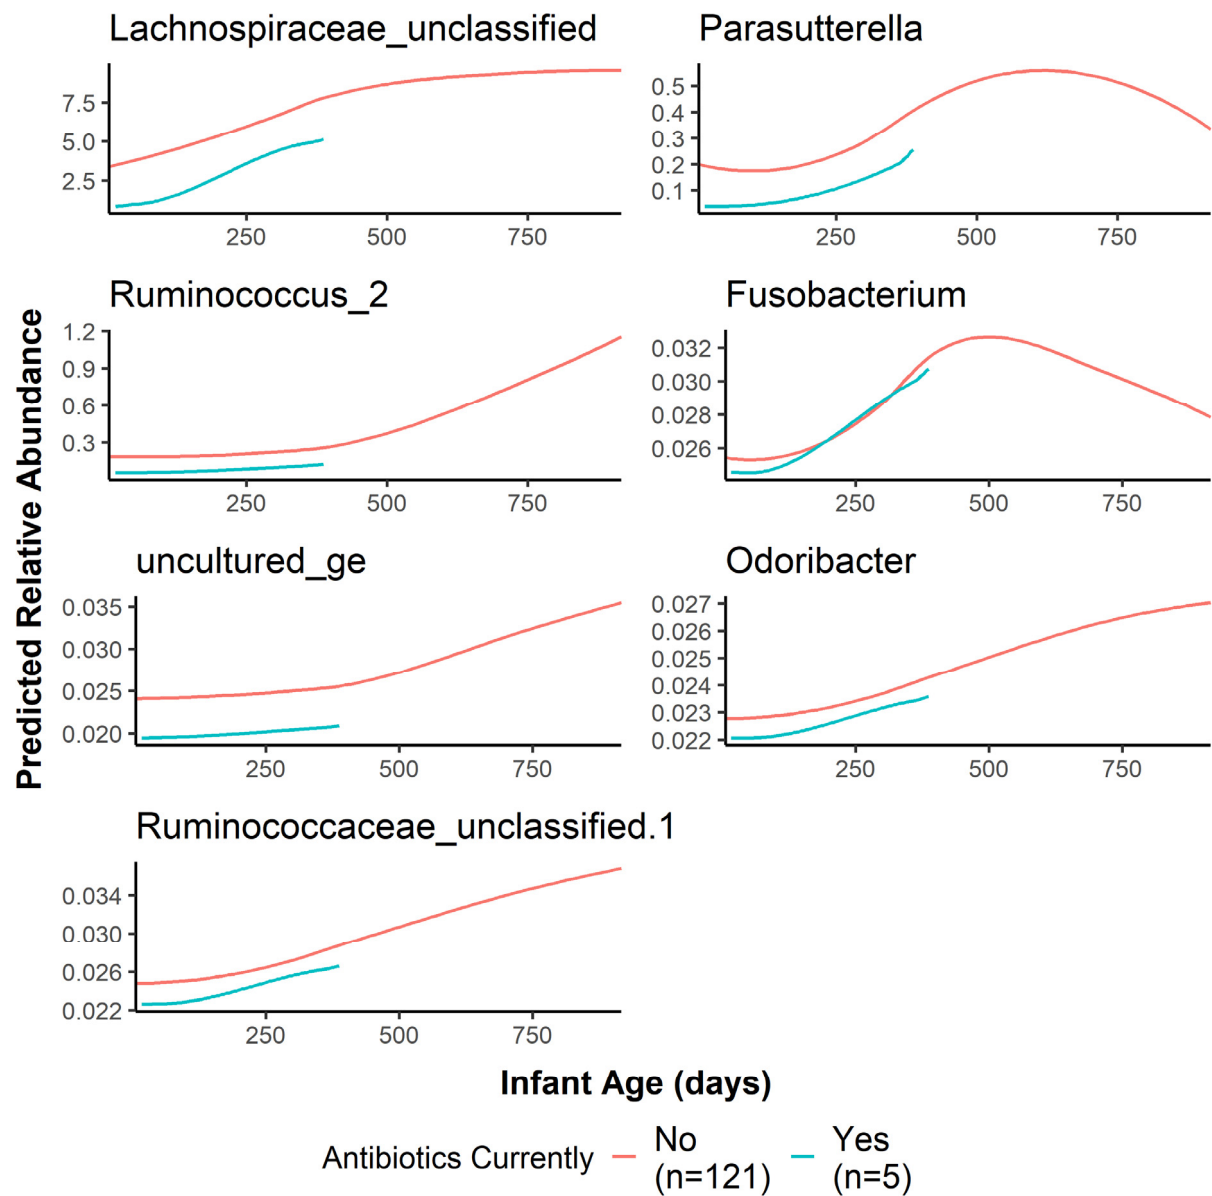

**Figure S4. Genus relative abundance predicted by age and antibiotic use at the time of fecal sampling.** Only the genera whose abundance was significantly predicted by age and antibiotic use at the time of sample collection are plotted.



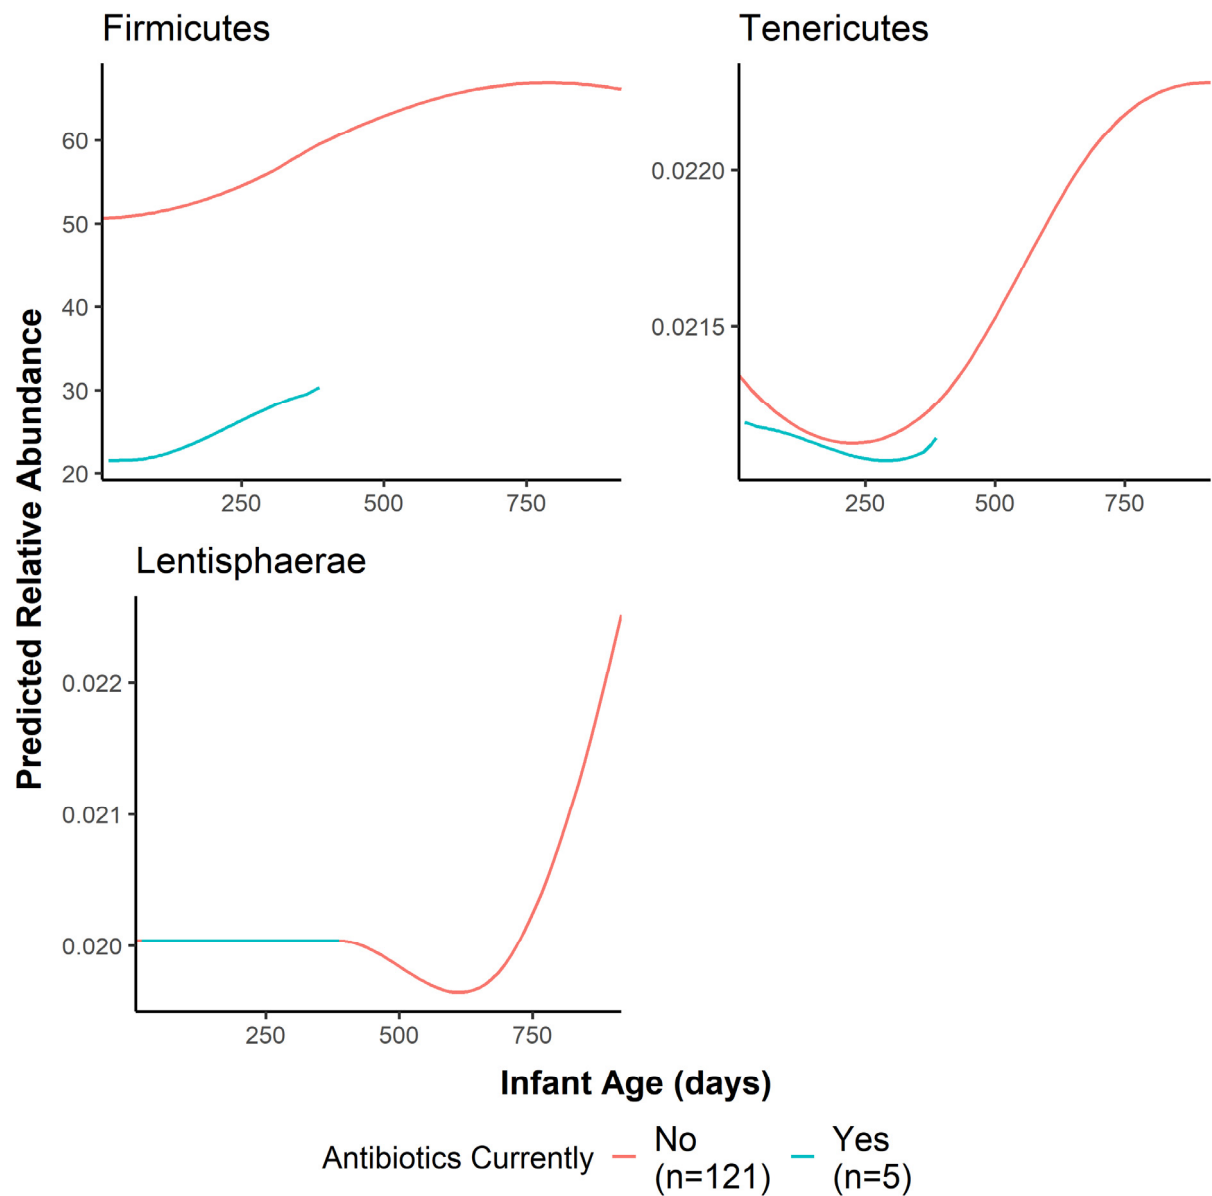

**Figure S5. Phylum relative abundance predicted by age and antibiotic use at the time of fecal sampling.** Only the phyla whose abundance was significantly predicted by age and antibiotic use at the time of sample collection are plotted.

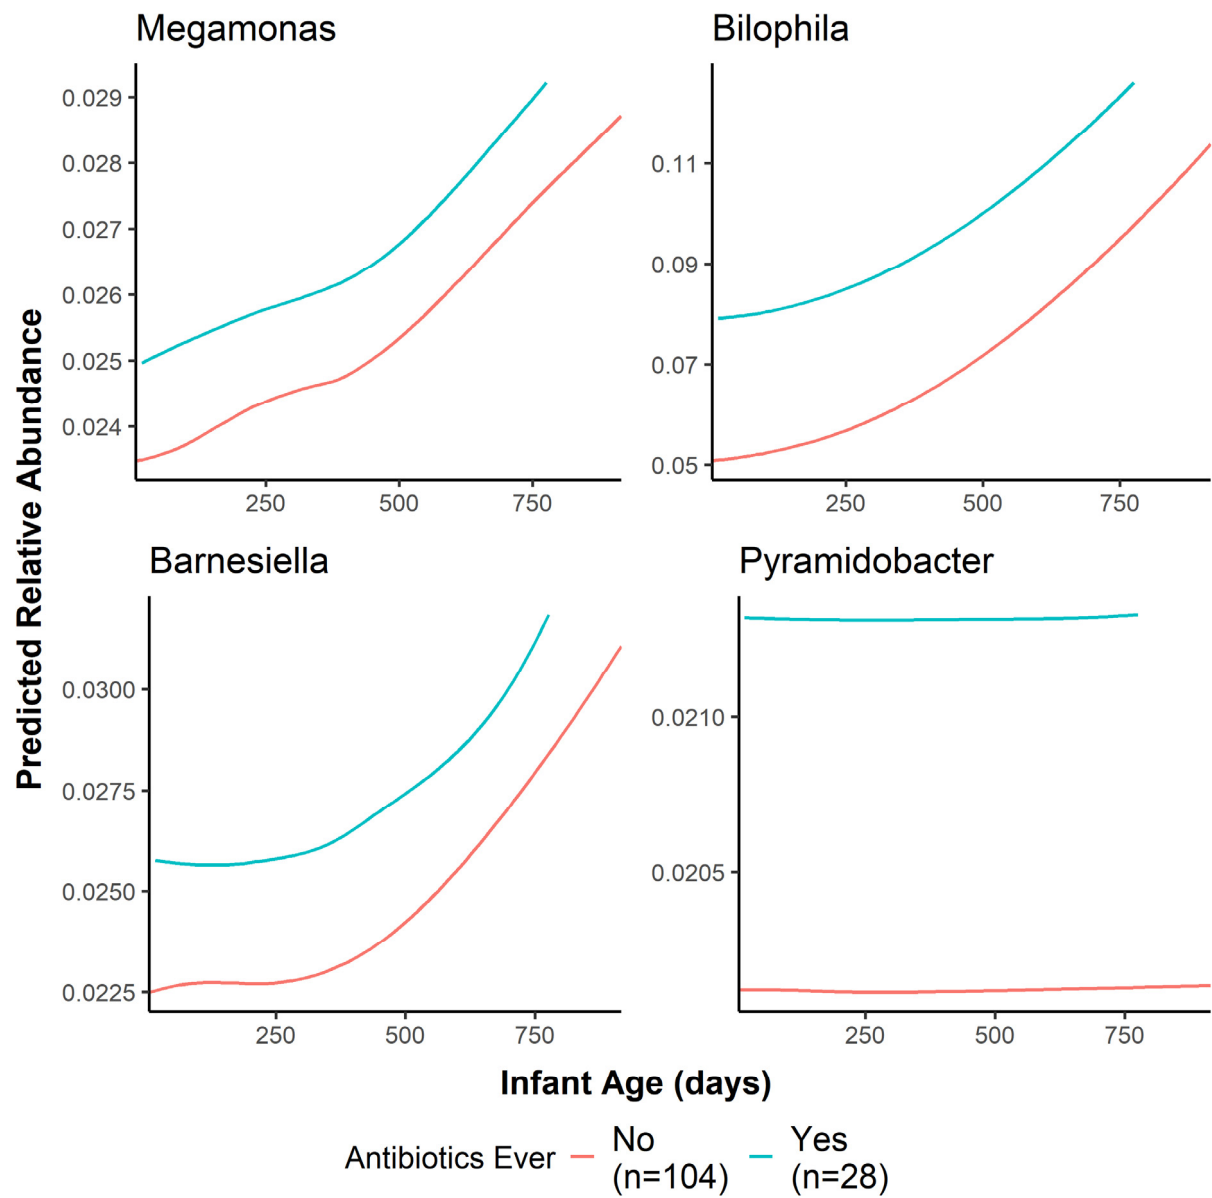

**Figure S6. Genus relative abundance predicted by age and antibiotic use ever.** Only the genera whose abundance was significantly predicted by age and antibiotic use ever are plotted.

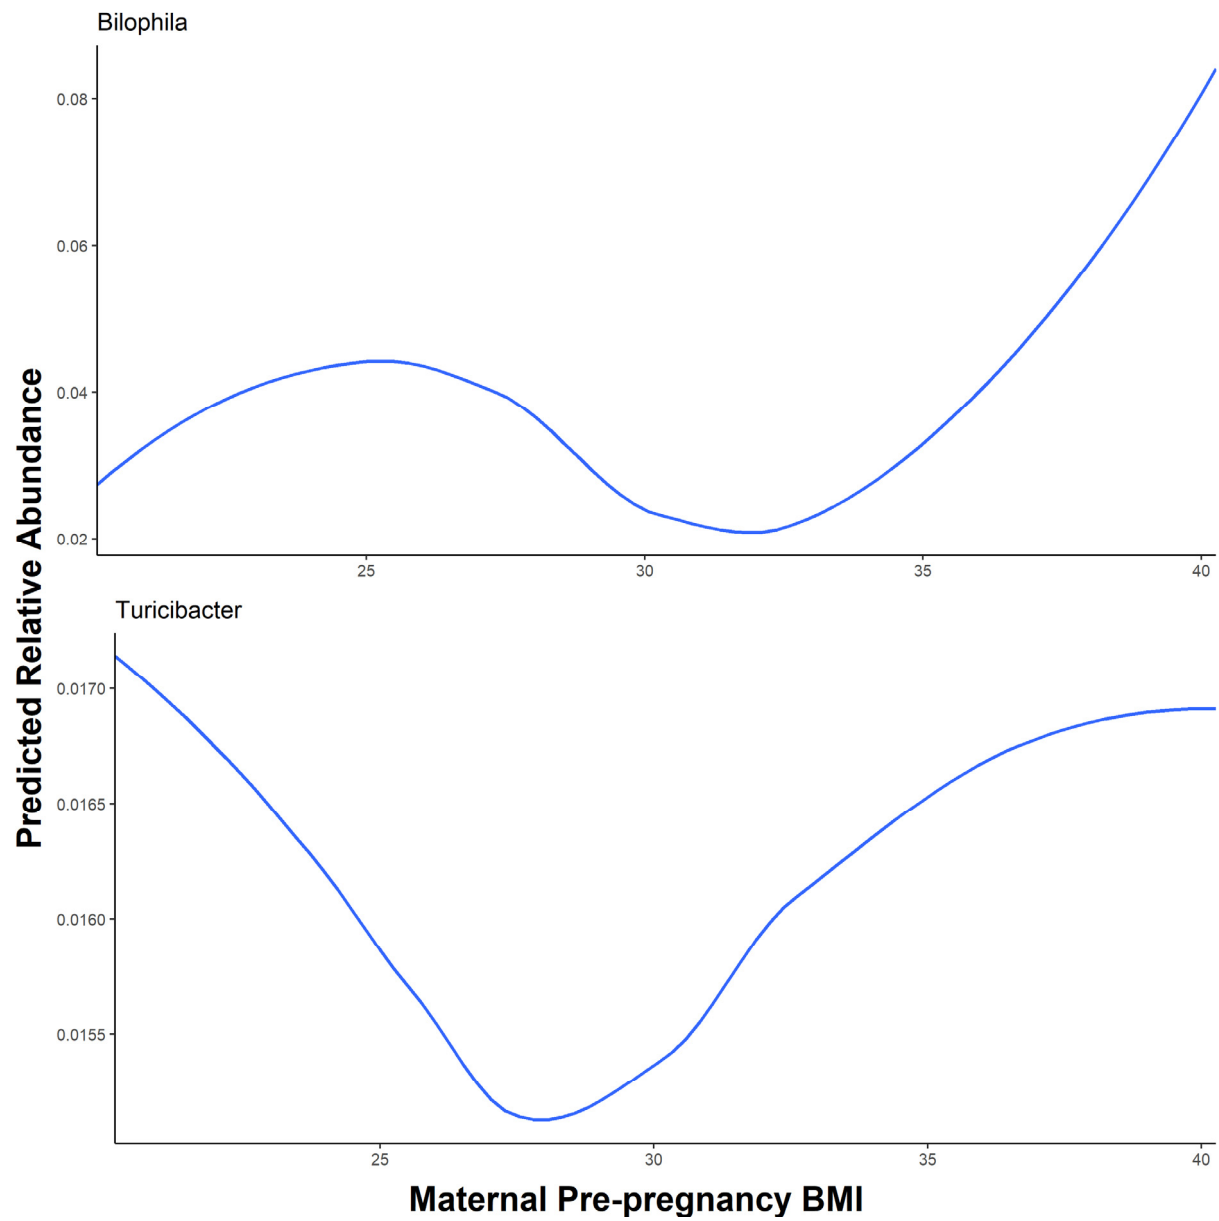

**Figure S7. Genus relative abundance predicted by maternal pre-pregnancy BMI.** Only the genera whose abundance was significantly predicted by age and maternal pre-pregnancy BMI are plotted.

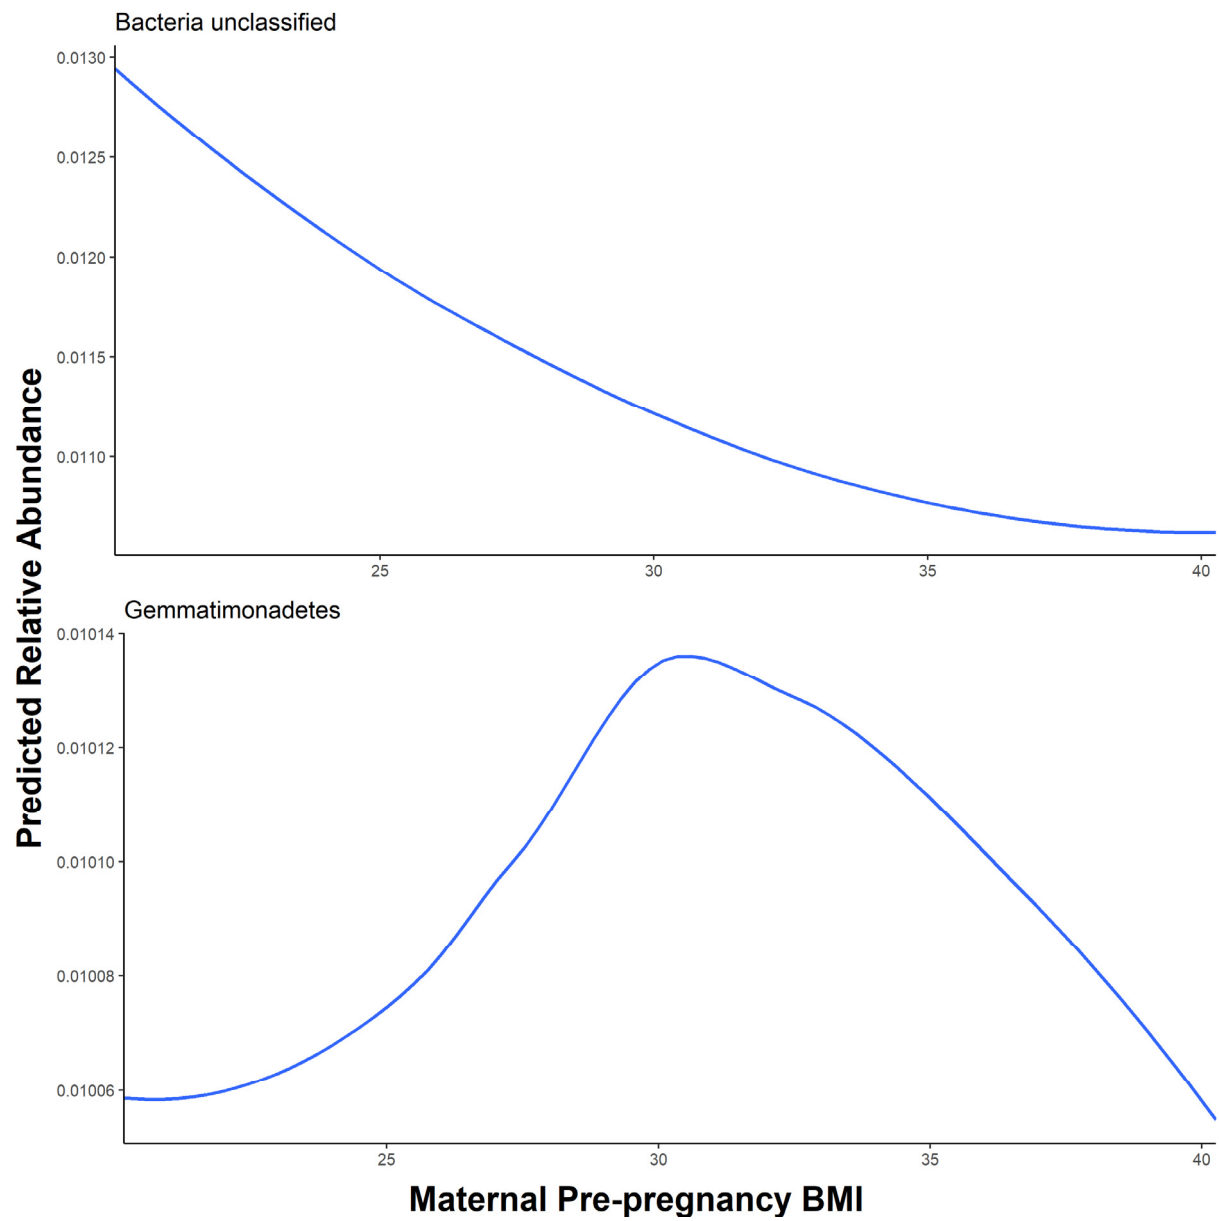

**Figure S8. Phylum relative abundance predicted by maternal pre-pregnancy BMI.** Only the phyla whose abundance was significantly predicted by age and maternal pre-pregnancy BMI are plotted.

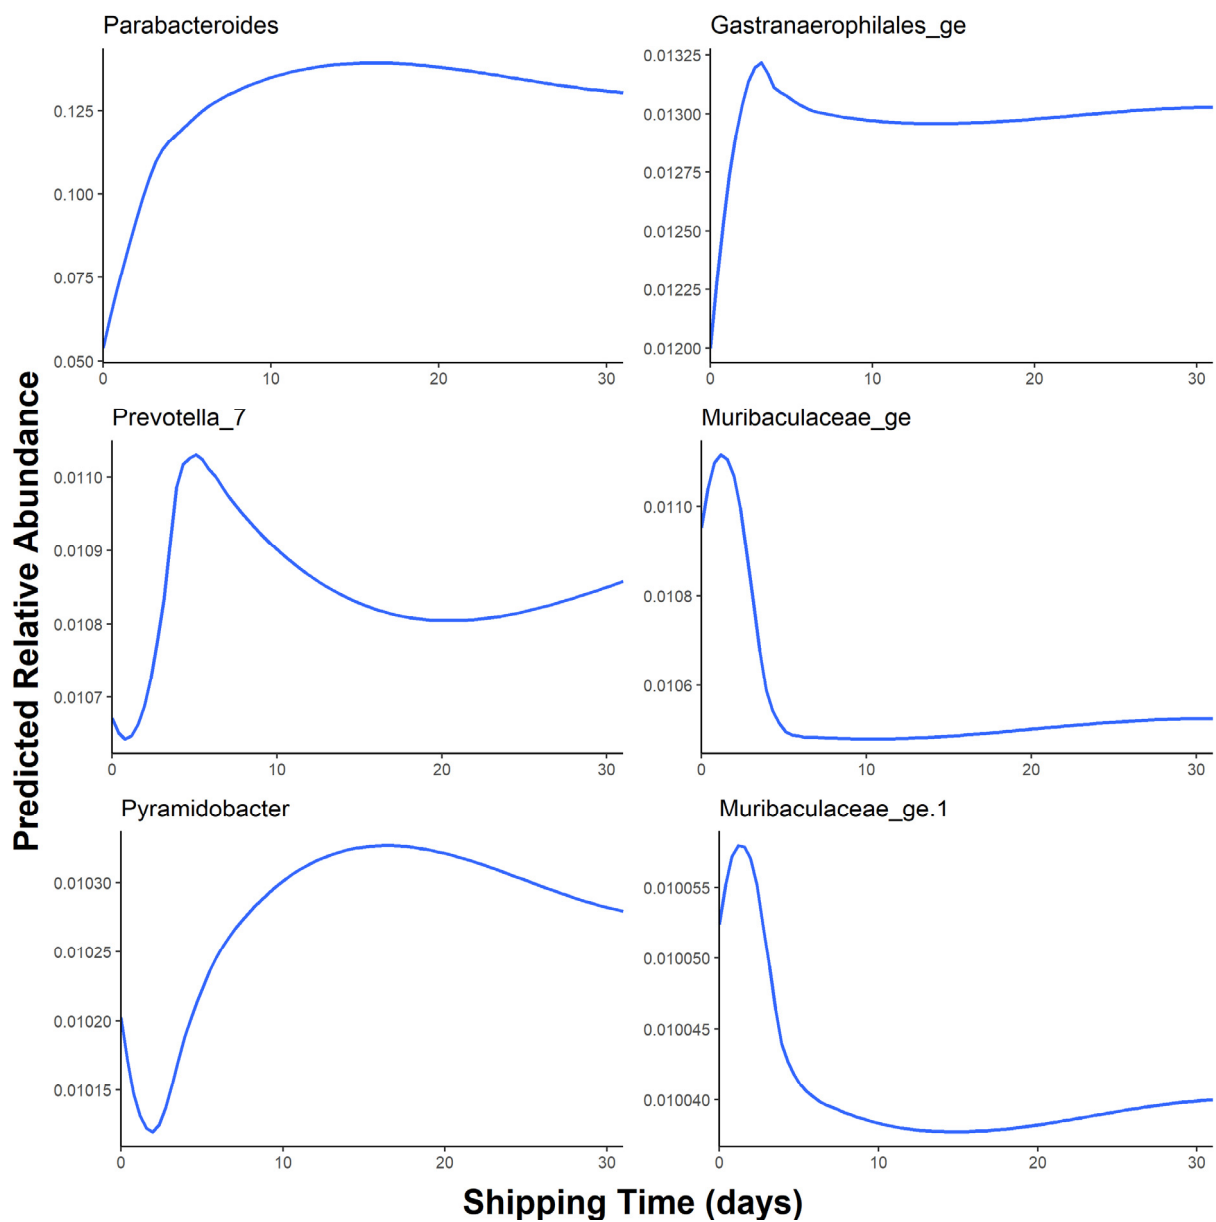

**Figure S9. Genus relative abundance predicted by sample shipping time.** Only the genera whose abundance was significantly predicted by age and sample shipping time are plotted.

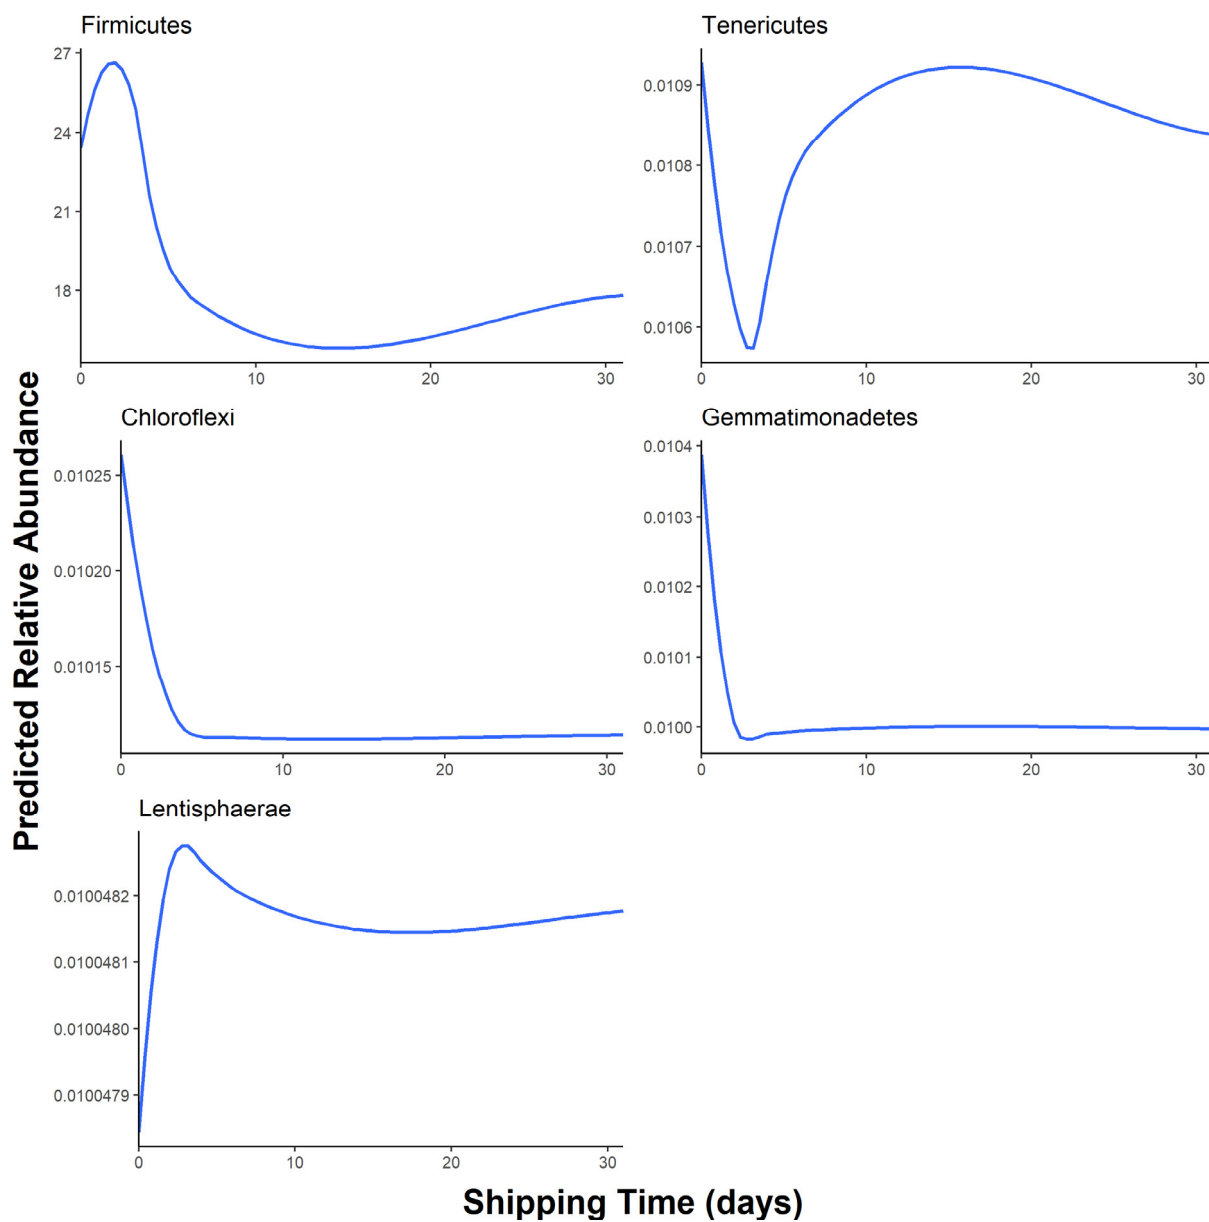

**Figure S10. Phylum relative abundance predicted by sample shipping time.** Only the phyla whose abundance was significantly predicted by age and sample shipping time are plotted.

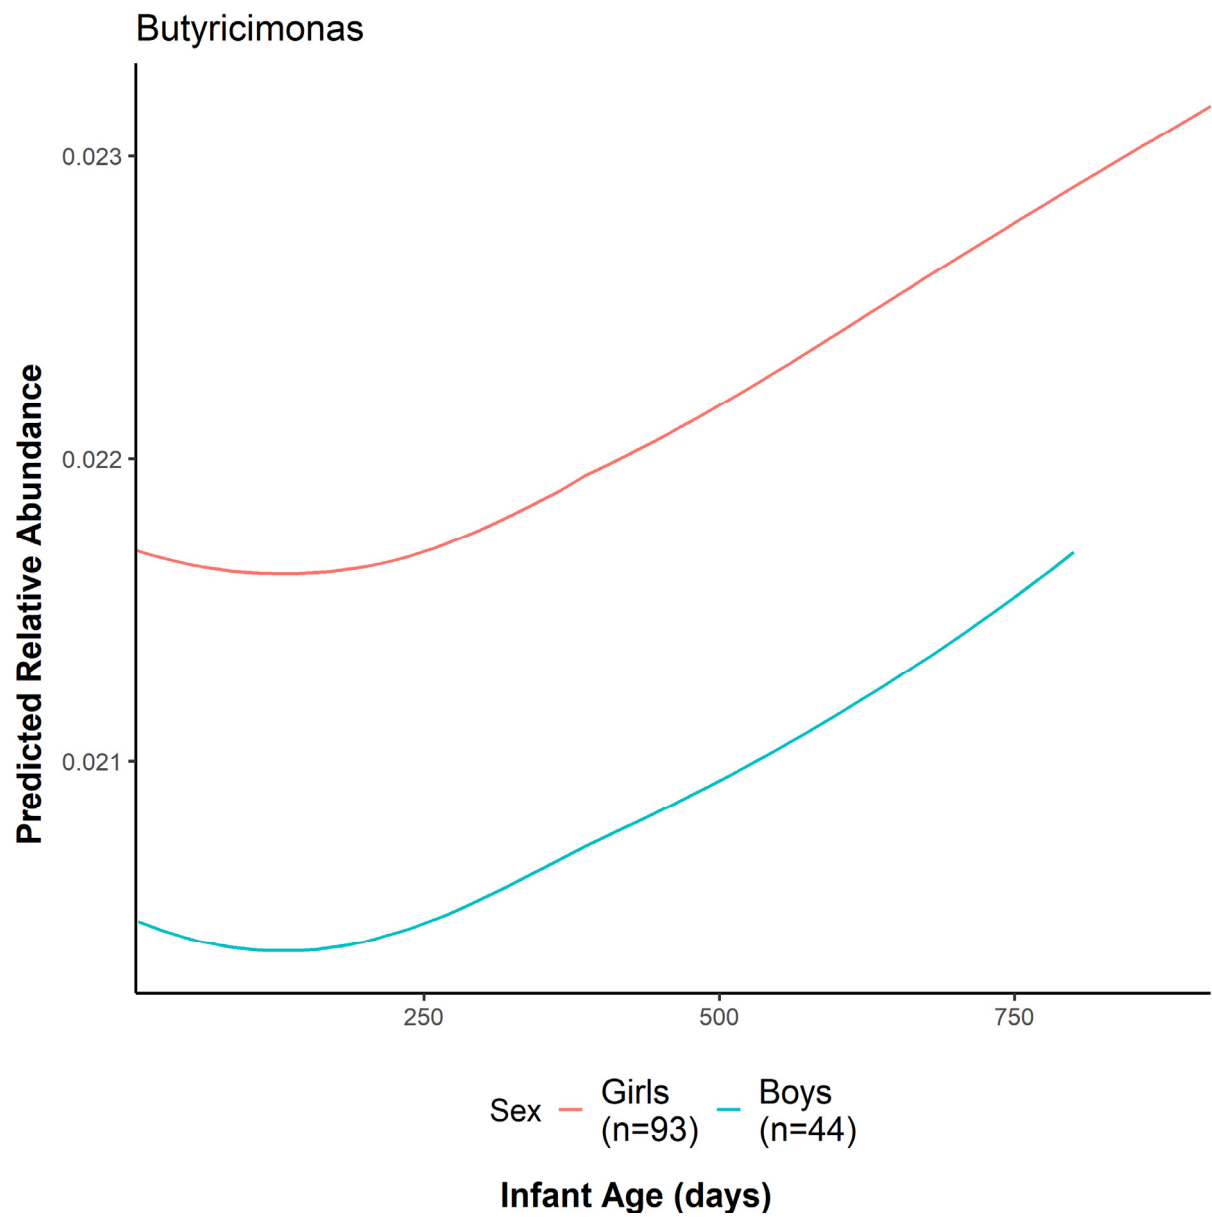

**Figure S11. Genus relative abundance predicted by age and sex.** Only the genera whose abundance was significantly predicted by age and sex are plotted.

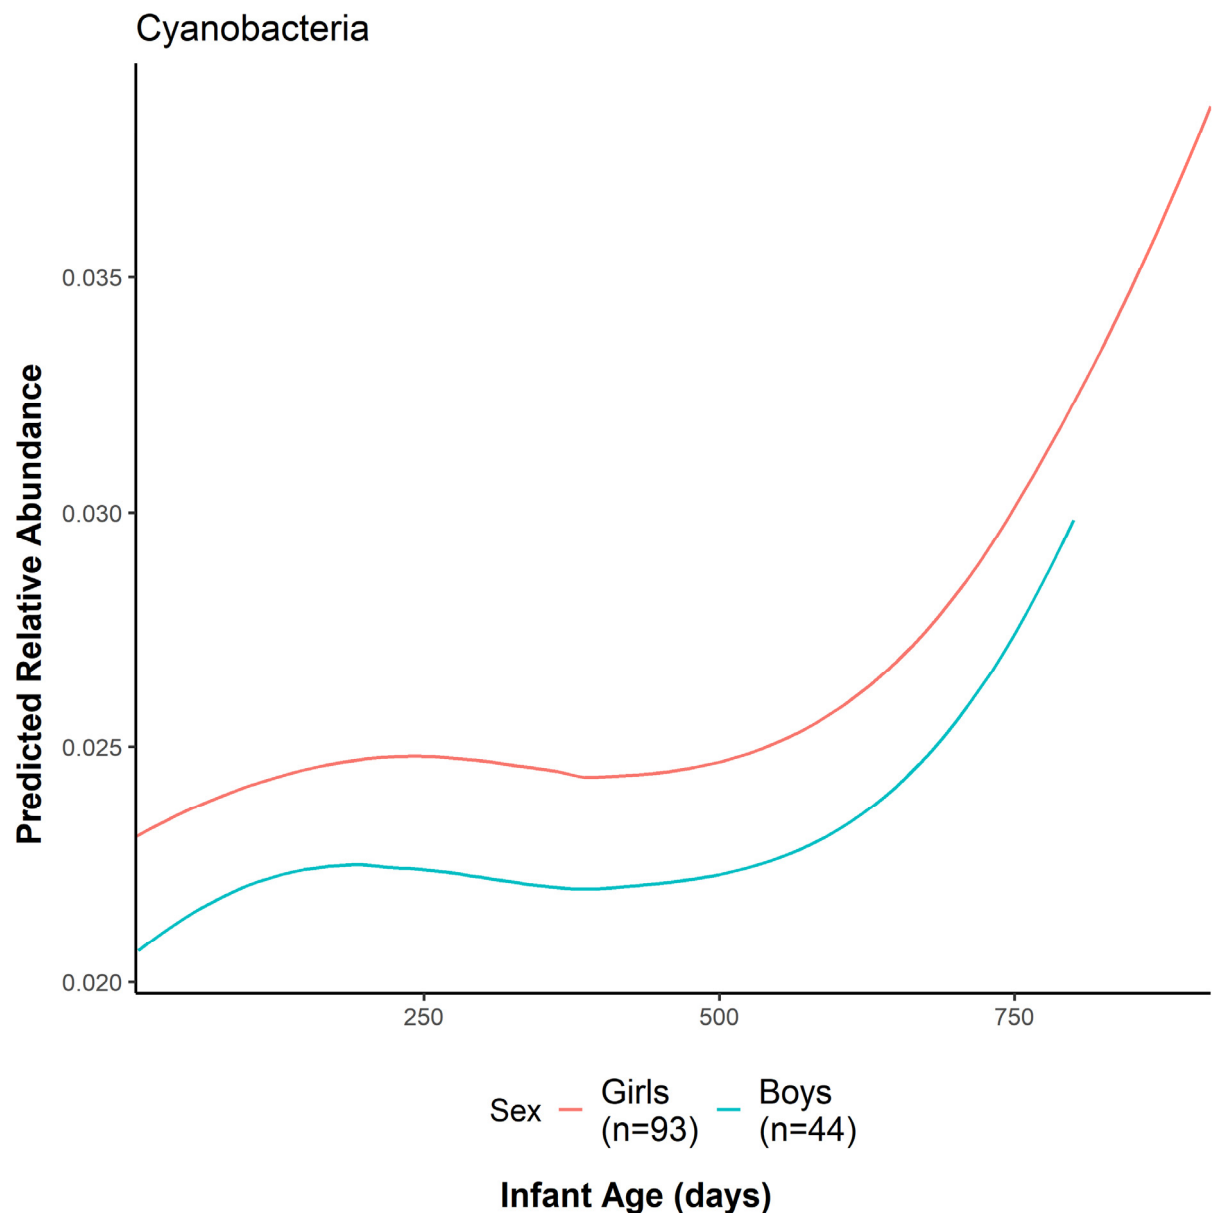

**Figure S12. Phylum relative abundance predicted by age and sex.** Only the phyla whose abundance was significantly predicted by age and sex are plotted.
